# Supplementary material for: Metabolite Profiling of “Green” Extracts of Cynara cardunculus subsp. scolymus, Cultivar “Carciofo di Paestum” PGI by 1H NMR and HRMS-Based Metabolomics
Source: MDPI journal article supplement (doi:10.3390/molecules27103328), 2022-05-22
Supplement: s1 [file s1]

## Supplementary material

**Table S1.** Compounds identified in *C. scolymus* MeOH extract by LC-ESI/Q-Exactive /MS/MS (negative ion mode).

**Table S2.** LC–MS/MS conditions for quantitation of compounds **1** and **9** by negative ion MRM mode.

**Figure S1.** <sup>1</sup>H NMR Spectrum (600 MHz, CD<sub>3</sub>OD) of MeOH extract

**Figure S2.** <sup>1</sup>H NMR Spectrum (600 MHz, CD<sub>3</sub>OD) of EtOH extract

**Figure S3.** <sup>1</sup>H NMR Spectrum (600 MHz, CD<sub>3</sub>OD) of EtOH:H<sub>2</sub>O 80:20

**Figure S4.** <sup>1</sup>H NMR Spectrum (600 MHz, CD<sub>3</sub>OD) of EtOH:H<sub>2</sub>O 70:30

**Figure S5.** <sup>1</sup>H NMR Spectrum (600 MHz, CD<sub>3</sub>OD) of EtOH:H<sub>2</sub>O 60:40

**Figure S6.** <sup>1</sup>H NMR Spectrum (600 MHz, CD<sub>3</sub>OD) of infusion

**Figure S7.** <sup>1</sup>H NMR Spectrum (600 MHz, CD<sub>3</sub>OD) of decoction

**Figure S8.** <sup>1</sup>H NMR Spectrum with annotations of identified primary metabolites detected in *C. scolymus* heads EtOH H<sub>2</sub>O (80:20) extract.

**Table S3.** Characteristic <sup>1</sup>H NMR peaks of primary metabolites identified in *C. scolymus* extracts.

**Table S4.** Phenolic content and antioxidant activity of green extracts of “Carciofo di Paestum”

**Table S5.** Correlation between TPC evaluated by Folin-Ciocalteu and antioxidant activity evaluated by the ABTS, and DPPH methods. The correlation coefficients among means were determined using Pearson’s method.

**Table S6.**  $\alpha$  glucosidase inhibitory activity of “Carciofo di Paestum” PGI extracts.

**Table S1.** Compounds identified in *C. scolymus* MeOH extract by LC-ESI/Q-Exactive /MS/MS (negative ion mode).

|    | Compound                                    | R <sub>t</sub> (min) | Molecular Formula                               | [M-H] <sup>-</sup> | Δ ppm | Characteristic product ions   |
|----|---------------------------------------------|----------------------|-------------------------------------------------|--------------------|-------|-------------------------------|
| 1  | 5-caffeoylquinic acid (chlorogenic acid)    | 8.54                 | C <sub>16</sub> H <sub>18</sub> O <sub>9</sub>  | 353.0876           | 2.38  | 191 (100), 179 (5), 135 (1)   |
| 2  | 3-caffeoylquinic acid (neochlorogenic acid) | 8.77                 | C <sub>16</sub> H <sub>18</sub> O <sub>9</sub>  | 353.0877           | 2.83  | 179 (74), 135 (27)            |
| 3  | 1,3-dicaffeoylquinic acid                   | 11.46                | C <sub>25</sub> H <sub>24</sub> O <sub>12</sub> | 515.1196           | 2.27  | 191 (40), 179 (100), 135 (49) |
| 4  | 5-feruloylquinic acid                       | 12.39                | C <sub>17</sub> H <sub>20</sub> O <sub>9</sub>  | 367.1026           | 0.60  | 173                           |
| 5  | luteolin-7-O-rutinoside                     | 13.75                | C <sub>27</sub> H <sub>30</sub> O <sub>15</sub> | 593.1495           | 0.97  | 447, 285                      |
| 6  | luteolin-7-O-β-D-glucopyranoside            | 14.17                | C <sub>21</sub> H <sub>20</sub> O <sub>11</sub> | 447.0931           | 2.13  | 285                           |
| 7  | luteolin-7-O-β-D-glucuronide                | 14.47                | C <sub>21</sub> H <sub>18</sub> O <sub>12</sub> | 461.0728           | 3.09  | 285                           |
| 8  | apigenin-7-O-rutinoside                     | 15.05                | C <sub>27</sub> H <sub>30</sub> O <sub>14</sub> | 577.1549           | 0.49  | 269                           |
| 9  | 1,5-dicaffeoylquinic acid (cynarin)         | 15.58                | C <sub>25</sub> H <sub>24</sub> O <sub>12</sub> | 515.1187           | 0.48  | 353, 191 (1), 179 (16)        |
| 10 | apigenin-7-O-β-D-glucopyranoside            | 15.75                | C <sub>21</sub> H <sub>20</sub> O <sub>10</sub> | 431.0972           | -0.06 | 269                           |
| 11 | apigenin-7-O-β-D-glucuronide                | 16.16                | C <sub>21</sub> H <sub>18</sub> O <sub>11</sub> | 445.0763           | -0.20 | 269                           |
| 12 | 4,5-dicaffeoylquinic acid                   | 16.29                | C <sub>25</sub> H <sub>24</sub> O <sub>12</sub> | 515.1186           | 0.36  | 353, 335, 191 (1), 179 (16)   |
| 13 | luteolin                                    | 19.08                | C <sub>15</sub> H <sub>10</sub> O <sub>6</sub>  | 285.0405           | 4.09  | 151, 133                      |
| 14 | salviaflaside                               | 19.74                | C <sub>24</sub> H <sub>26</sub> O <sub>13</sub> | 521.1304           | 2.69  | 313, 298                      |
| 15 | cynarasaponin J                             | 20.22                | C <sub>47</sub> H <sub>74</sub> O <sub>19</sub> | 941.4747           | 0.72  | 779, 629                      |
| 16 | apigenin                                    | 21.07                | C <sub>15</sub> H <sub>10</sub> O <sub>5</sub>  | 269.0454           | 3.68  | 225, 117                      |
| 17 | cynarasaponin A                             | 21.80                | C <sub>47</sub> H <sub>74</sub> O <sub>18</sub> | 925.4792           | 0.05  | 763, 613                      |

**Table S2.** LC-MS/MS conditions for quantitation of compounds **1** and **9** by negative ion MRM mode.

| Compound                               | MRM transition | R <sup>2</sup> | Regression line     | DP    | CE    | EP    | CXP   | LOD  | LOQ  |
|----------------------------------------|----------------|----------------|---------------------|-------|-------|-------|-------|------|------|
| 5-caffeoylquinic acid ( <b>1</b> )     | 353 → 191      | 0.99           | y = 0.00319x + 3.31 | -60.0 | -24.0 | -4.0  | -17.0 | 0.02 | 0.07 |
| 1,5-dicaffeoylquinic acid ( <b>9</b> ) | 515 → 353      | 0.99           | y = 6.77e-6x + 0.38 | -61.0 | -24.0 | -4.0  | -38.0 | 0.25 | 0.84 |
| resveratrol (internal standard)        | 227 → 143      | -              | -                   | -37.0 | -32.0 | -10.0 | -18.0 | -    | -    |

**DP**, Declustering Potential; **CE**, Collision energy; **EP**, Entrance potential; **CXP**, Collision Cell Exit Potential;

**LOQ**, limit of quantification; **LOD**, limit of detection; LOD and LOQ expressed as μg/μL.

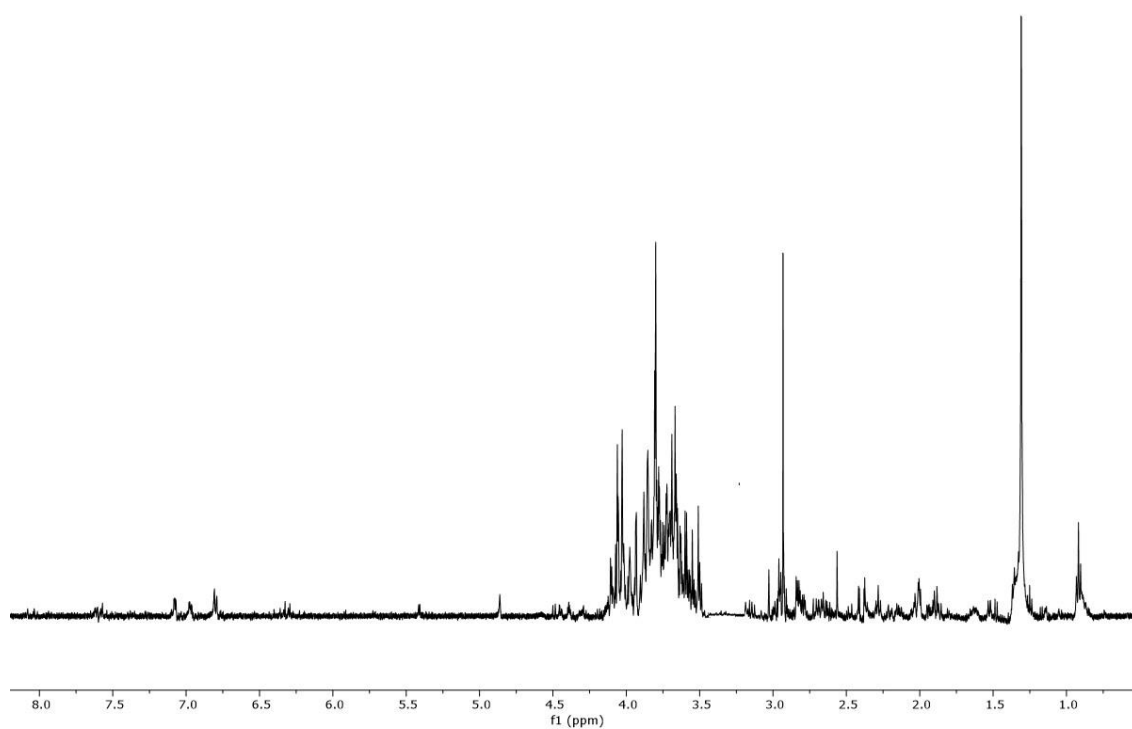

**Figure S1.**  $^1\text{H}$  NMR Spectrum (600 MHz,  $\text{CD}_3\text{OD}$ ) of MeOH extract

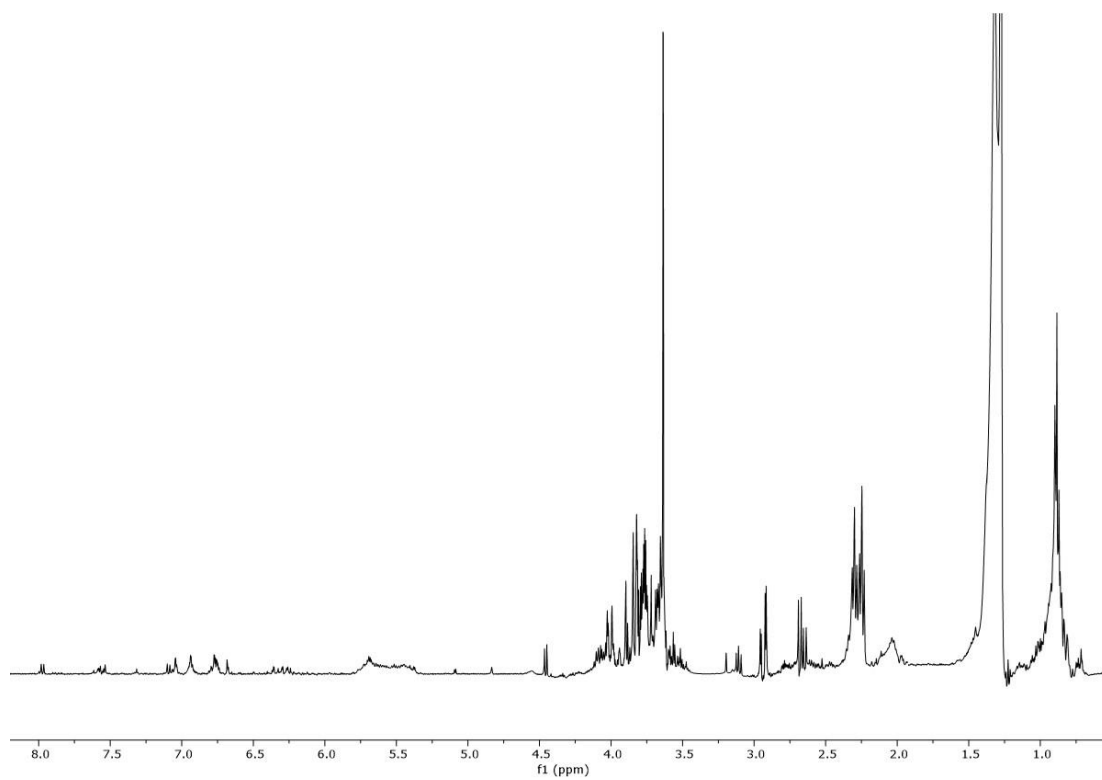

**Figure S2.**  $^1\text{H}$  NMR Spectrum (600 MHz,  $\text{CD}_3\text{OD}$ ) of EtOH extract

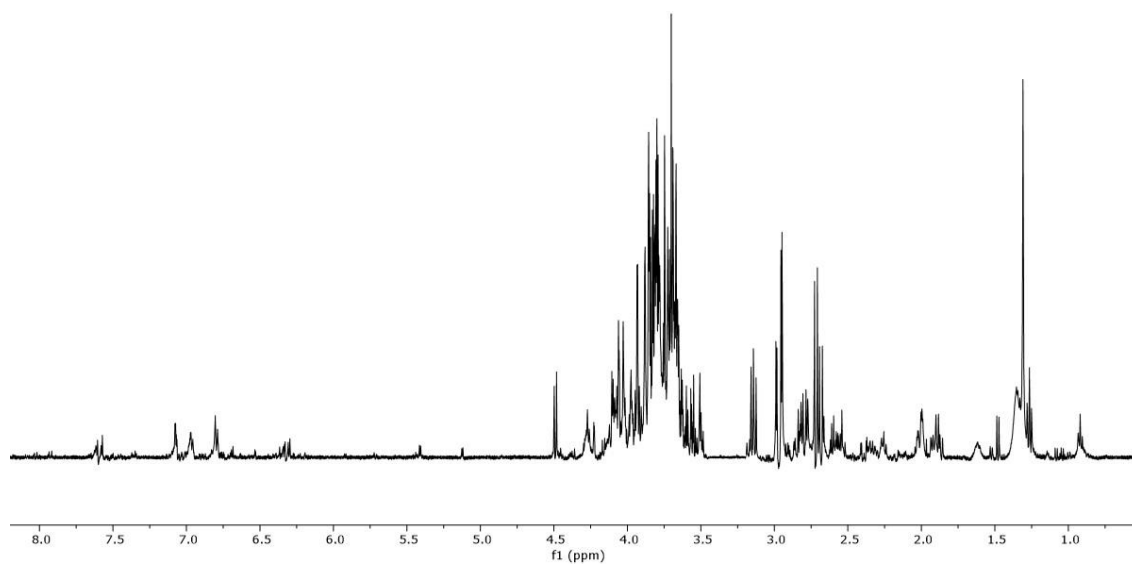

**Figure S3.**  $^1\text{H}$  NMR Spectrum (600 MHz,  $\text{CD}_3\text{OD}$ ) of EtOH:H<sub>2</sub>O 80:20

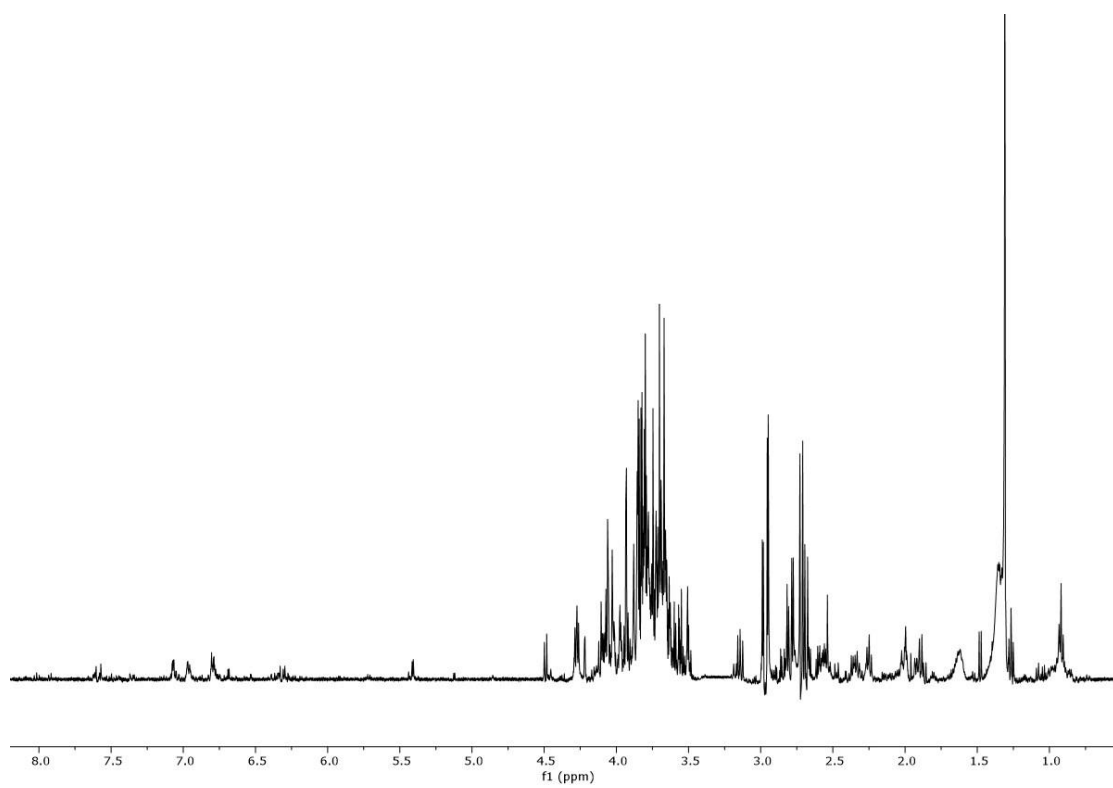

**Figure S4.**  $^1\text{H}$  NMR Spectrum (600 MHz,  $\text{CD}_3\text{OD}$ ) of EtOH:H<sub>2</sub>O 70:30

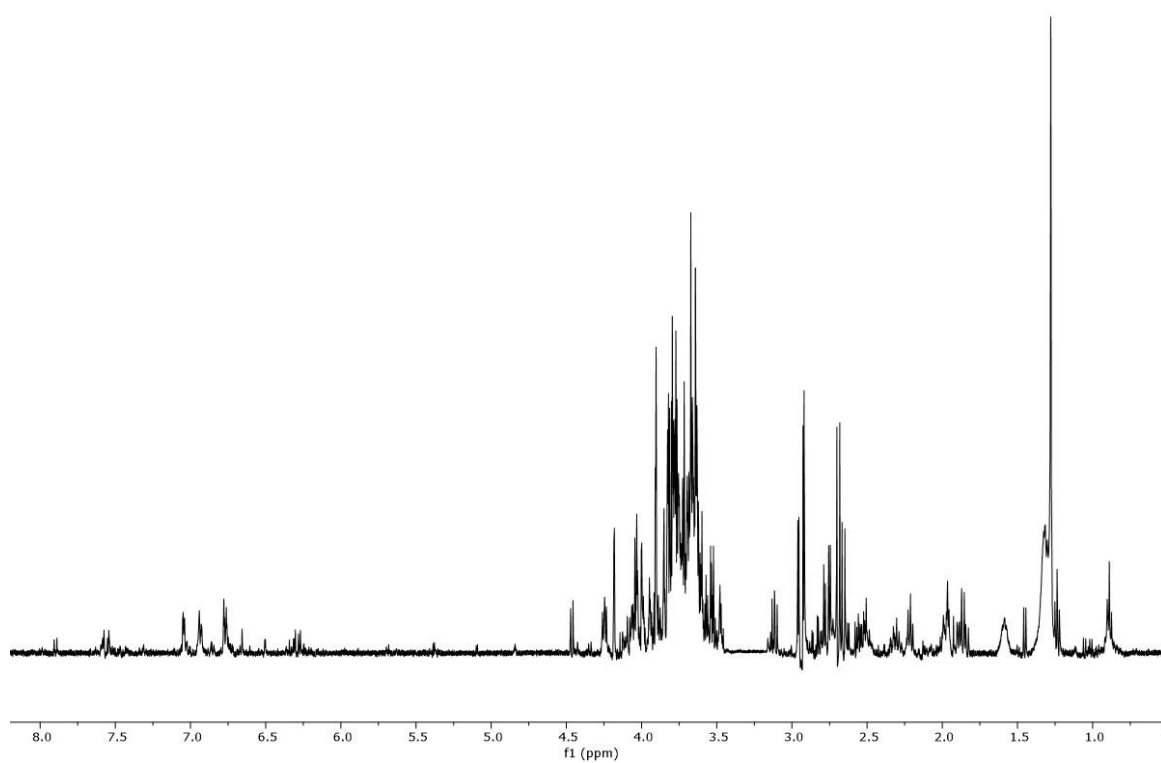

**Figure S5.**  $^1\text{H}$  NMR Spectrum (600 MHz,  $\text{CD}_3\text{OD}$ ) of EtOH:H<sub>2</sub>O 60:40

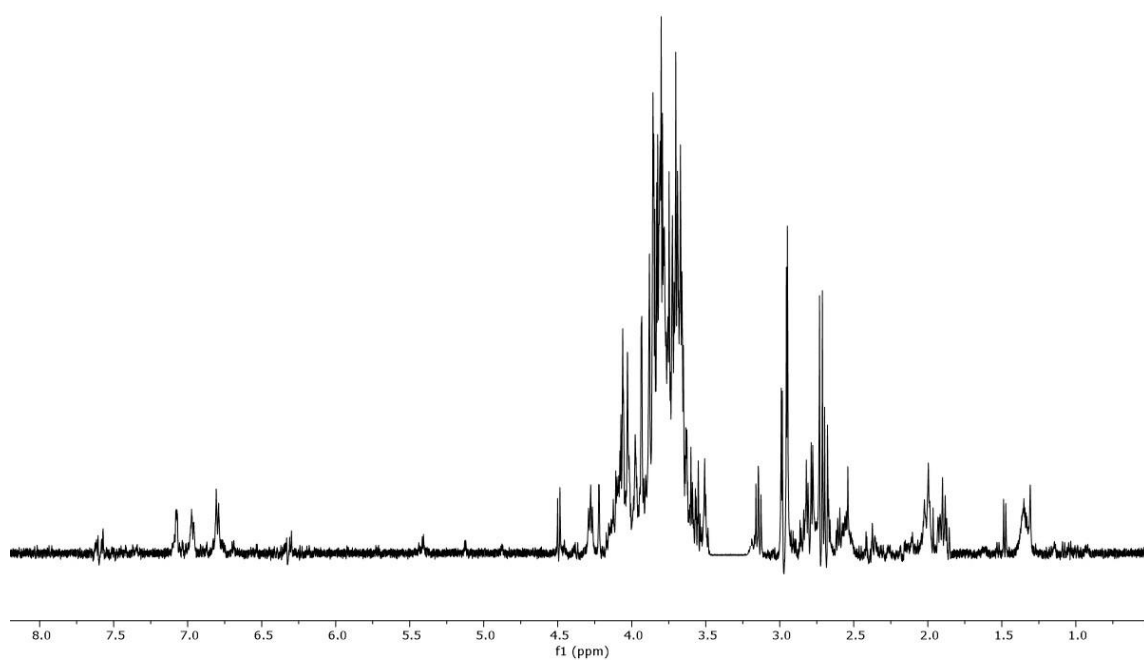

**Figure S6.**  $^1\text{H}$  NMR Spectrum (600 MHz,  $\text{CD}_3\text{OD}$ ) of infusion

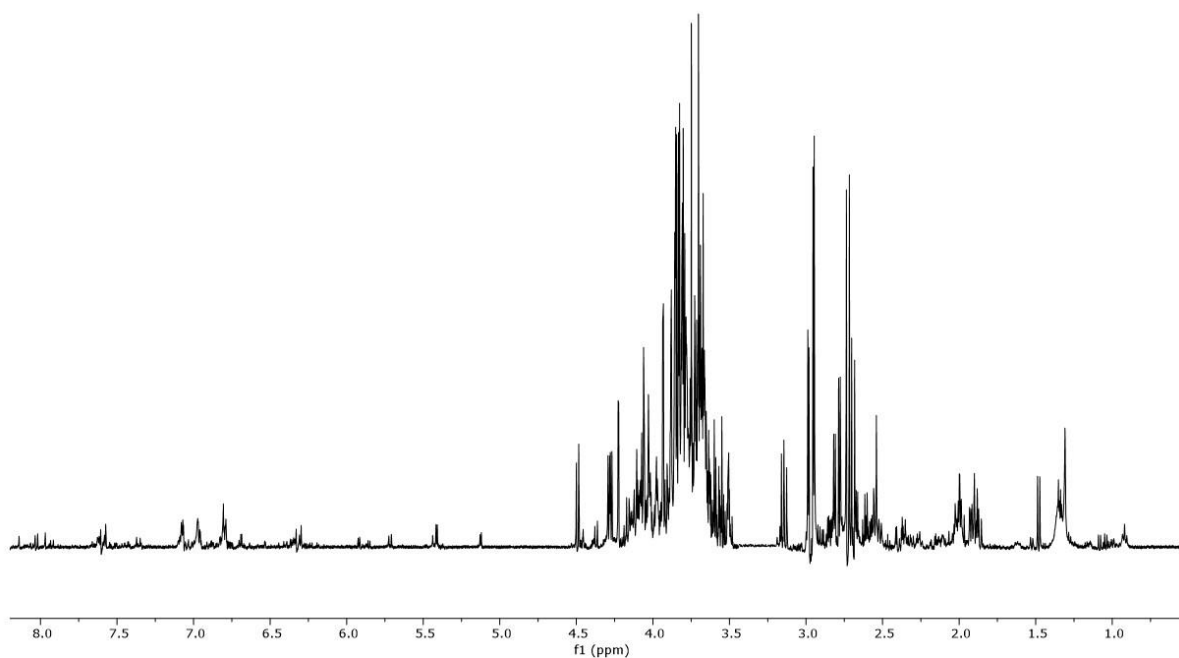

**Figure S7.** <sup>1</sup>H NMR Spectrum (600 MHz, CD<sub>3</sub>OD) of decoction

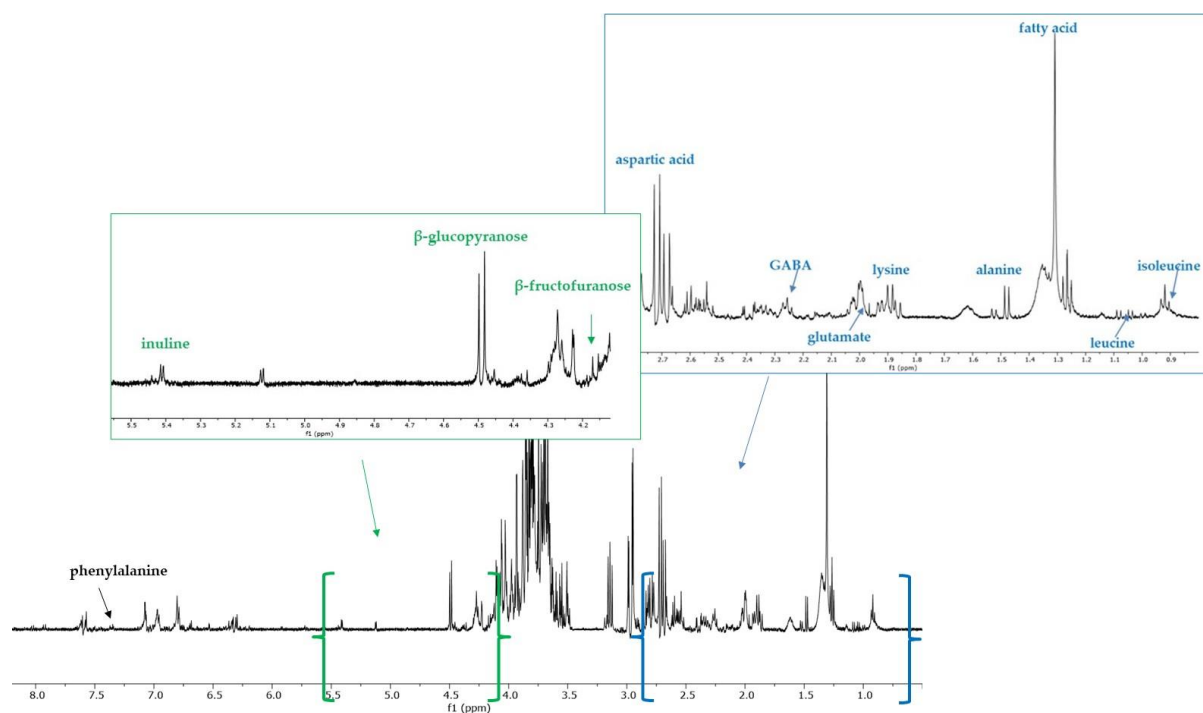

**Figure S8.** <sup>1</sup>H NMR Spectrum with annotations of identified primary metabolites detected in *C. scolymus* heads EtOH H<sub>2</sub>O (80:20) extract.

**Table S3.** Characteristic  $^1\text{H}$  NMR peaks of primary metabolites identified in *C. scolymus* extracts.

| compound                | $^1\text{H}$ chemical shift<br>(multiplicity, $J$ in Hz) |
|-------------------------|----------------------------------------------------------|
| isoleucine              | 0.94 (t, 7.0)                                            |
| leucine                 | 1.07 (d, 7.0)                                            |
| fatty acid              | 1.27 (s)                                                 |
| alanine                 | 1.47 (d, 7.2)                                            |
| lysine                  | 1.87 (d, 8.0)                                            |
| glutamate               | 2.07 (m)                                                 |
| GABA                    | 2.27 (t, 7.2)                                            |
| aspartic acid           | 2.75 (dd, 3.0, 16.0)                                     |
| $\beta$ -fructofuranose | 4.19 (d, 2.3)                                            |
| $\beta$ -glucopyranose  | 4.47 (d, 8.0)                                            |
| inuline                 | 5.40 (d, 5.0)                                            |
| phenylalanine           | 7.32 (m)                                                 |

**Table S4.** Phenolic content and antioxidant activity of green extracts of “Carciofo di Paestum”

|                           | Total phenolics content | DPPH $^{\bullet}$        | ABTS $^{\bullet+}$    |
|---------------------------|-------------------------|--------------------------|-----------------------|
| <i>C.scolymus</i> extract | GAE $^a \pm$ SD $^b$    | IC $_{50}^c \pm$ SD $^b$ | TEAC $^d \pm$ SD $^b$ |
| MeOH                      | 195.25 $\pm$ 6.65       | 231.71 $\pm$ 4.9         | 1.01 $\pm$ 0.05       |
| EtOH                      | 276.25 $\pm$ 8.89       | 165.02 $\pm$ 3.02        | 1.30 $\pm$ 0.02       |
| EtOH:H $_2$ O 80:20       | 565.14 $\pm$ 6.00       | 80.51 $\pm$ 1.00         | 1.73 $\pm$ 0.03       |
| EtOH:H $_2$ O 70:30       | 512.30 $\pm$ 4.44       | 97.30 $\pm$ 0.31         | 1.76 $\pm$ 0.04       |
| EtOH:H $_2$ O 60:40       | 562.17 $\pm$ 9.63       | 96.53 $\pm$ 0.12         | 1.78 $\pm$ 0.08       |
| Infusion                  | 347.41 $\pm$ 7.41       | 106.42 $\pm$ 0.40        | 1.59 $\pm$ 0.09       |
| decotion                  | 377.48 $\pm$ 1.48       | 164.96 $\pm$ 0.65        | 1.41 $\pm$ 0.05       |
| Vitamin C $^e$            | 14.93 $\pm$ 0.10        |                          |                       |
| Quercetin $^f$            |                         |                          | 2.30 $\pm$ 0.08       |

$^a$  Values are expressed as milligrams of gallic acid equivalents (GAE) per gram of dried extract (mg GAE/g dried extract).;  $^b$ SD: Results are expressed as mean of three experiments; SD, standard deviation.  $^c$  Values are expressed as micrograms per milliliter ( $\mu\text{g/mL}$ ), concentrations of extracts 50-200 $\mu\text{g/mL}$   $^d$  Values are expressed as concentration (mM) of a standard Trolox solution exerting the same antioxidant activity of a 1 mg/mL solution of the tested extract, concentration of extracts 0.25-1.0 mg/mL.  $^e$ standard compound for DPPH assay, concentrations used 50-200  $\mu\text{g/mL}$ .  $^f$ standard compound for TEAC assay, concentrations used 0.3-1.5 mM.

**Table S5.** Correlation between TPC evaluated by Folin-Ciocalteu and antioxidant activity evaluated by the ABTS, and DPPH methods. The correlation coefficients among means were determined using Pearson’s method.

| Assay | Artichoke extracts<br>$R^2$ |
|-------|-----------------------------|
| TEAC  | 0.94                        |
| DPPH  | -0.89                       |

**Table S6.**  $\alpha$ -glucosidase inhibitory activity of “Carciofo di Paestum” PGI extracts.

| Artichoke extracts | IC $_{50} \pm$ SD ( $\mu\text{g/mL}$ ) |
|--------------------|----------------------------------------|
|--------------------|----------------------------------------|

---

|                             |              |
|-----------------------------|--------------|
| MeOH                        | 179.4± 8.32  |
| EtOH                        | 141.6 ± 2.35 |
| EtOH:H <sub>2</sub> O 60:40 | 159.3 ± 7.10 |
| EtOH:H <sub>2</sub> O 70:30 | 147.3 ± 2.84 |
| EtOH:H <sub>2</sub> O 80:20 | 125.3 ± 1.86 |
| infusion                    | 137.1 ± 5.28 |
| decoction                   | 134.4± 3.93  |
| acarbose                    | 132.5 ± 2.90 |

---
